# Supplementary material for: Waxberry-like hierarchical Ni@C microspheres with high-performance microwave absorption
Source: Royal Society of Chemistry journal article supplement (doi:10.1039/c9tc00771g), 2019-01-01
Supplement: c9tc00771g1.pdf [file c9tc00771g1.pdf]

## Supporting Information

### Waxberry-like hierarchical Ni@C microspheres as high-performance microwave absorber

Dawei Liu,<sup>a</sup> Yunchen Du,<sup>\*a</sup> Ping Xu,<sup>a</sup> Na Liu,<sup>b</sup> Yahui Wang,<sup>a</sup> Honghong Zhao,<sup>a</sup> Liru Cui,<sup>a</sup> and Xijiang Han<sup>\*a</sup>

<sup>a</sup> *MIIT Key Laboratory of Critical Materials Technology for New Energy Conversion and Storage, School of Chemistry and Chemical Engineering, Harbin Institute of Technology, Harbin 150001, P.R. China*

<sup>b</sup> *Department of Military Installation, Army Logistic University of PLA, Chongqing 401331, P.R. China*

---

*\* Corresponding authors.*

Tel.: +86-(451)-86413702.

Fax: +86-(451)-86418750.

E-mail address: yunchendu@hit.edu.cn (Y. Du); hanxijiang@hit.edu.cn (X. Han);

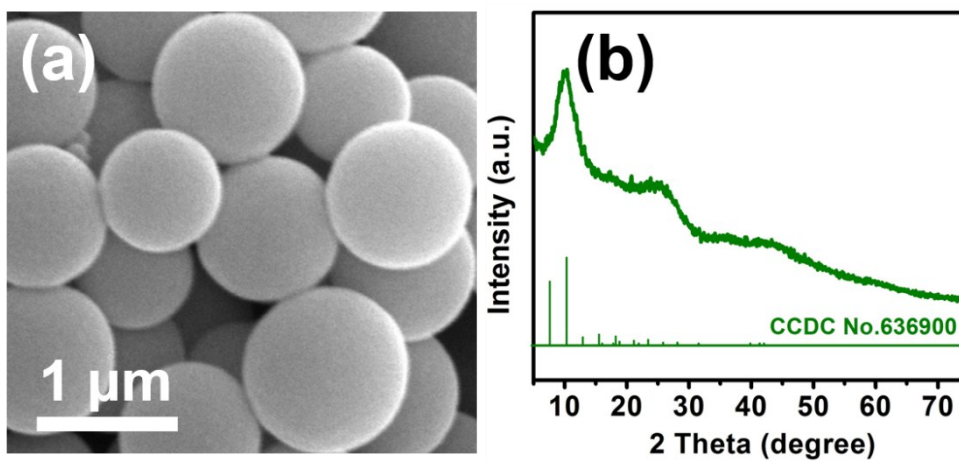

**Fig. S1** SEM image (a) and XRD pattern (b) of Ni-btc microspheres.

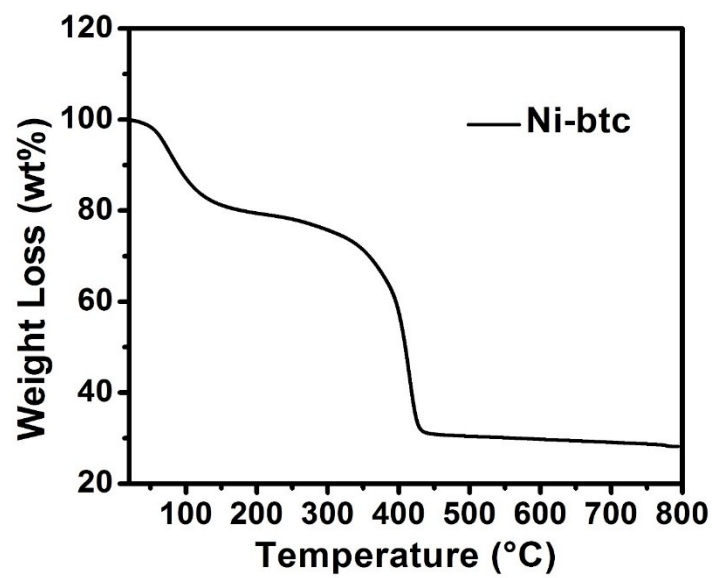

**Fig. S2** TG curve under Ar atmosphere of Ni-btc.

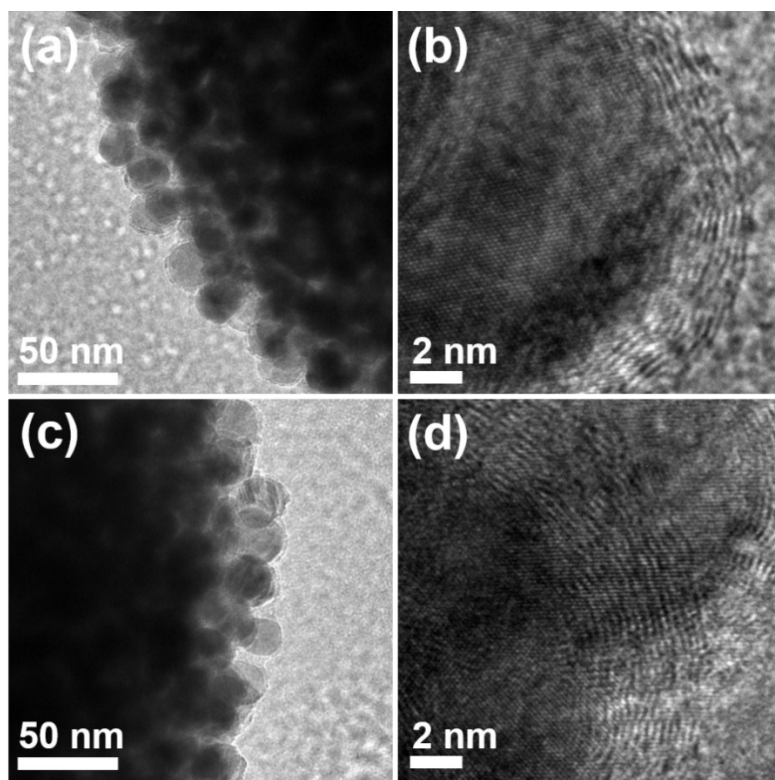

**Fig. S3** TEM images of Ni@C-650 (a and b) and Ni@C-750 (c and d).

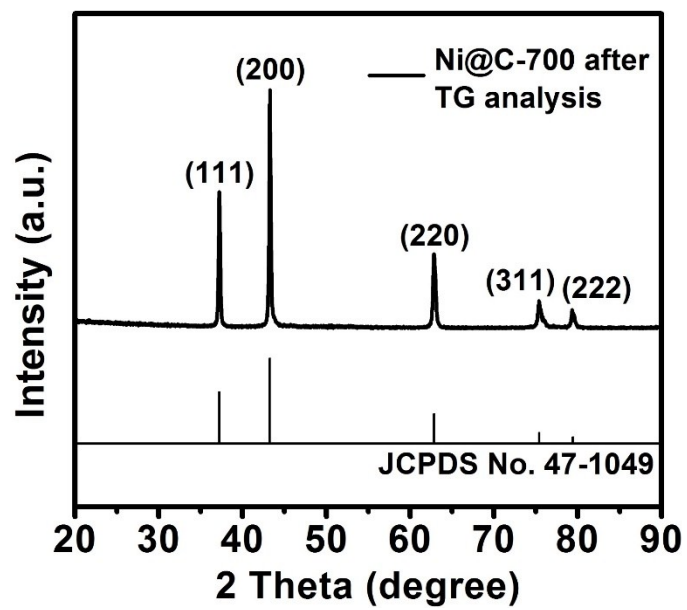

Fig. S4 XRD pattern of Ni@C-700 after TG analysis.

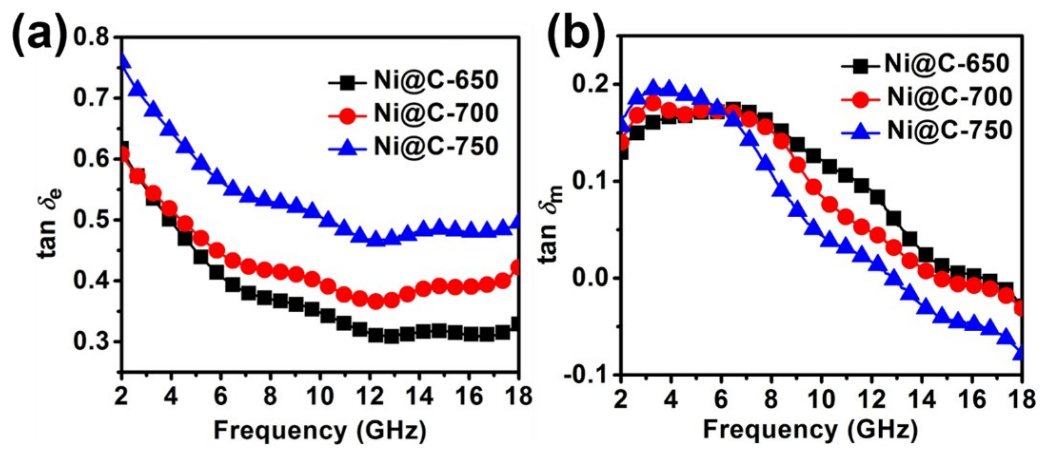

**Fig. S5** Dielectric loss tangents (a) and magnetic loss tangents (b) of Ni@C-650, Ni@C-700 and Ni@C-750.

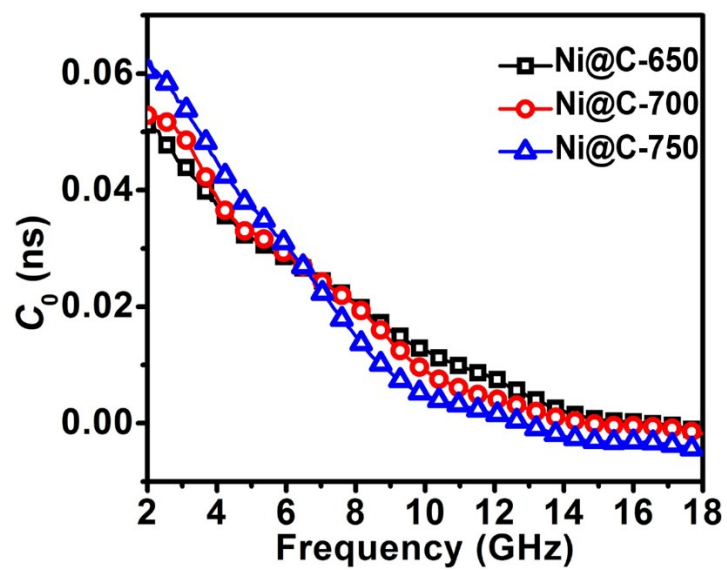

**Fig. S6**  $C_0$  curves of Ni@C-650, Ni@C-700 and Ni@C-750.

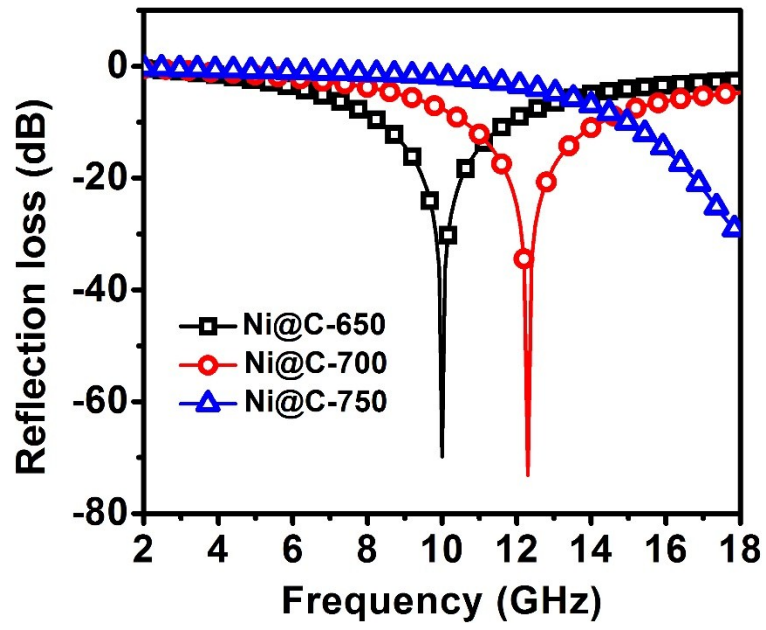

**Fig. S7** The reflection loss curves of Ni@C-650, Ni@C-700 and Ni@C-750.



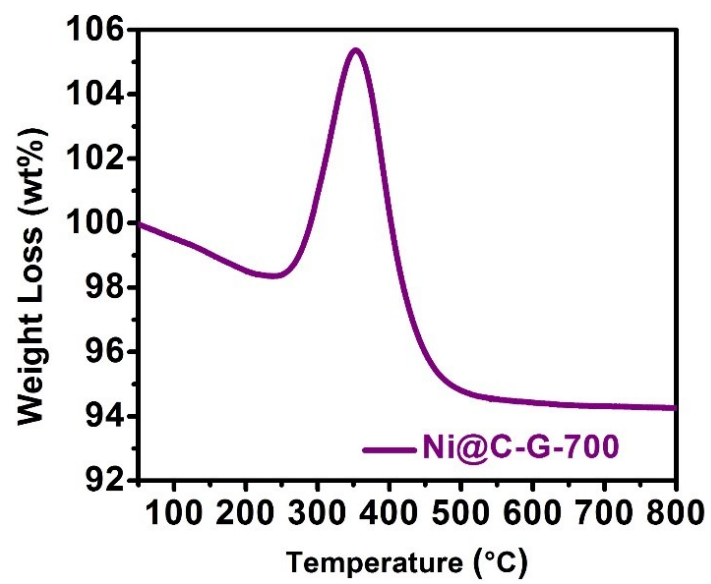

Fig. S8 TG curve of Ni@C-G-700.

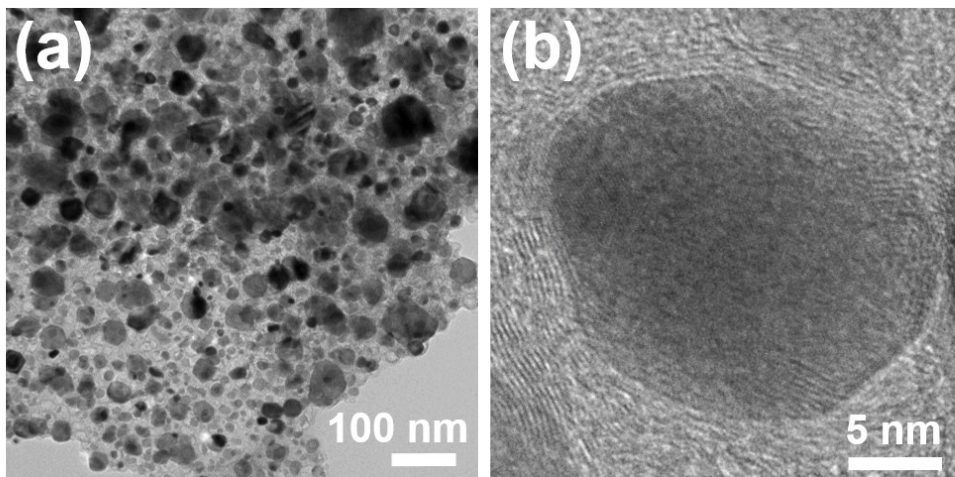

**Fig. S9** TEM images of Ni@C-G-700.

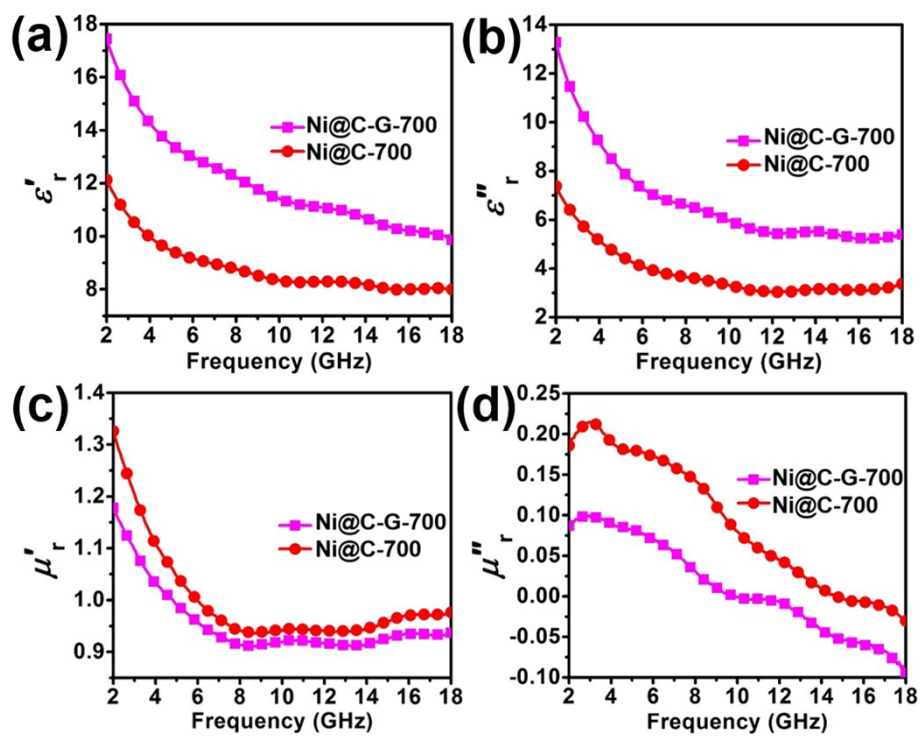

**Fig. S10**  $\epsilon_r'$  (a),  $\epsilon_r''$  (b),  $\mu_r'$  (c), and  $\mu_r''$  (d) values of Ni@C-G-700 and Ni@C-700.

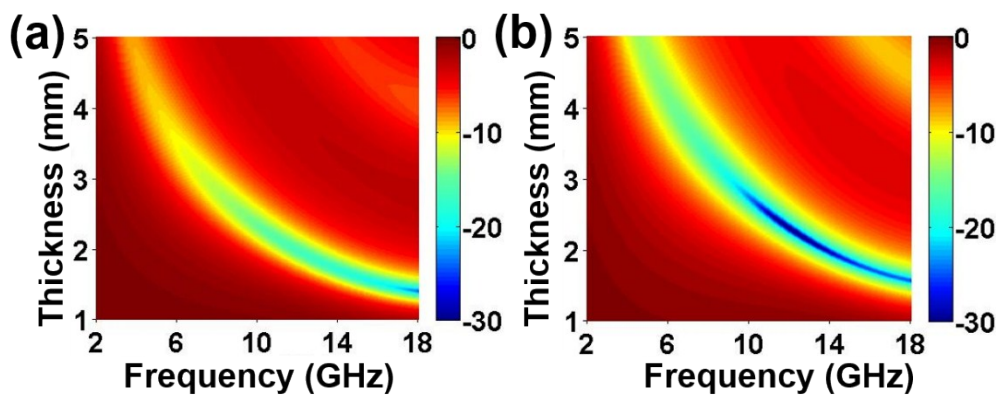

**Fig. S11** Two-dimensional RL maps of Ni@C-G-700 (a) and Ni@C-700 (b).

**Table S1** Some detailed parameters about RL characteristics of Ni@C-G-700 and Ni@C-700.

| Samples    | Minimum RL values (dB)<br>(frequency, thickness) | Bandwidth <-10 dB (GHz)<br>(range, thickness) | Integrated<br>thickness | Integrated response<br>bandwidth (GHz)<br>(range) |
|------------|--------------------------------------------------|-----------------------------------------------|-------------------------|---------------------------------------------------|
| Ni@C-G-700 | -24.7 (18.0 GHz, 1.4 mm)                         | 4.4 (13.6-18.0 GHz, 1.6 mm)                   | 1.0-5.0 mm              | 12.2 (5.8-18.0 GHz)                               |
| Ni@C-700   | -73.2 (12.3 GHz, 2.2 mm)                         | 4.8 (13.2-18.0 GHz, 1.8 mm)                   | 1.0-5.0 mm              | 14.2 (3.8-18.0 GHz)                               |
